# Supplementary material
Source: PubMed Central journal article supplement (PMC5807072)
Supplement: NIHMS936535-supplement.pdf [file NIHMS936535-supplement.pdf]

## Supplemental Figure Legends

### Figure S1, related to Figure 1. Hyperplasia of the small intestine in *Lpcat3*-deficient mice.

- (A) Expression of *Lpcat3* in small intestine and colon of F/F and *CreERT2* mice (n=6,7 mice/group).
- (B) Body weight change in tamoxifen-injected F/F and *CreERT2* mice (n=5,7 mice/group).
- (C) Small intestine length of tamoxifen-injected F/F and *CreERT2* mice (n=8,9 mice/group).
- (D) Representative histology of Duodenum from F/F and *CreERT2* mice 3 weeks after tamoxifen injection.
- (E) Quantification of crypt number and villus/crypt length ratio in Duodenum and Jejunum from F/F and *CreERT2* mice 3 weeks after tamoxifen injection (n=4 mice/group).
- (F) Representative histology of Duodenum and Jejunum from female *CreERT2* mice with/without tamoxifen injection for 8 weeks (n=5 mice/group).
- (G) Expression of *Lpcat3* in Duodenum from F/F and *CreERT2* mice 14 weeks after tamoxifen injection (n=6,7 mice/group).
- (H) Representative images of intestines from F/F and *CreERT2* mice 14 weeks after tamoxifen injection.
- (I) Small intestine length of F/F and *CreERT2* mice 14 weeks after tamoxifen injection (n=6,7 mice/group).
- (J) Representative images of Id1 immunostaining in colon of F/F and *CreERT2* mice 3 weeks after tamoxifen injection.

Values are means  $\pm$  SEM. Statistical analysis was performed with Student's t test (A, B, C, E, G, and I). \*  $P < 0.05$ , \*\*  $P < 0.01$ , \*\*\*  $P < 0.001$ , \*\*\*\*  $P < 0.0001$ . Scale bars: 20  $\mu\text{m}$  (J), 100  $\mu\text{m}$  (F) and 200  $\mu\text{m}$  (D).

**Figure S2., related to Figure 1. Loss of Lpcat3 impairs ISC differentiation.**

(A) Representative images of immunofluorescence (IF) staining and quantification of Lysozyme positive Paneth cells in Jejunum from F/F and *CreERT2* mice 3 weeks after tamoxifen injection (~100 crypts from 4 mice/group).

(B) Representative images of Periodic Acid Schiff (PAS) staining and quantification of goblet cells in Jejunum as in A (~100 villi from 4 mice/group).

(C) Representative images of IF staining and quantification of Chromogranin A (ChgA) positive enteroendocrine cells in Jejunum as in A (~50 villus-crypt units from 4 mice/group).

(D) Expression of cytokines in F/F and *CreERT2* intestines (n=5 mice/group).

Values are means  $\pm$  SEM. Statistical analysis was performed with Student's t test. \*\*\*\*

$P < 0.0001$ , n.s. not significant. Scale bars: 50  $\mu\text{m}$  (A and C), and 100  $\mu\text{m}$  (B).

**Figure S3, related to Figure 2. Lipidomic analysis of crypts and PGE2 production in Jejunum from control and Lpcat3-deficient mice.**

(A-B) ESI-MS/MS analysis of the abundance of PC species and total PC in crypts isolated from F/F and *CreERT2* mice.

(C) Expression of Cox-1 and Cox-2 in crypts (n=10 F/F mice, and 9 *CreERT2* mice) and intestines (n=8 F/F mice, and 6 *CreERT2* mice).

**(D)** PGE2 concentration in F/F and *CreERT2* Jejunums determined by ELISA assay ((n=12 F/F mice, and 10 *CreERT2* mice).

Values are means  $\pm$  SEM. Statistical analysis was performed with Student's t test. \*  $P < 0.05$ , \*\*  $P < 0.01$ , \*\*\*  $P < 0.001$ .

**Figure S4, related to Figure 3. Effects of *Lpcat3* deficiency on expression of the SREBP-1, Wnt, Notch, Yap and PPAR $\delta$  pathways.**

**(A-C, E)** Expression of selective genes in Wnt (A), Notch, Yap (B), PPAR $\delta$  (C) and fatty acid biosynthetic pathways (E) in F/F and *CreERT2* crypts analyzed by realtime RT-PCR (n=11 F/F mice, and 9 *CreERT2* mice).

**(D)** Expression of selective genes in cholesterol biosynthesis in F/F and *CreERT2* colons (n=6,7 mice/group)

**(F)** Expression of selective genes in F/F and *CreERT2* organoids treated with vehicle (DMSO) or 4-hydroxytamoxifen (4-OHT, 100 nM) (n=7~8).

Values are means  $\pm$  SEM. Statistical analysis was performed with Student's t test (A-E) and one-way ANOVA (F). \*  $P < 0.05$ , \*\*  $P < 0.01$ , \*\*\*  $P < 0.001$ .

**Figure S5, related to Figure 4. Inhibition of cholesterol biosynthesis reduces Id1+ progenitor cells in *Lpcat3*-deficient intestine.**

**(A)** Representative images of Ro48 treated organoids in the presence of cholesterol or epicholesterol.

**(B)** Quantification of villus length in Jejunum of control and *Lpcat3* deficient mice treated with vehicle or Ro48 (~20-50 villi per mouse, 3 *CreERT2* and 2 F/F mice/group).

(C) Representative images of IHC staining of *Olfm4* positive ISC in Jejunum of control mice treated with vehicle or Ro48.

(D-E) Representative images of immunostaining and quantification of Lysozyme positive Paneth cells (D) and PAS positive goblet cells (E) in Jejunum of *CreERT2* mice treated with vehicle or Ro48 (n=3 mice/group, ~40 crypts and ~100 villi per mouse).

(F) Representative images of IHC of cleaved caspase 3 in Jejunum of *CreERT2* mice treated with vehicle or Ro48 (n=3 mice/group).

(G) Representative images of immunostaining and quantification of Id1-positive progenitor cells in Jejunum of *CreERT2* mice treated with vehicle or Ro48 (n=3 mice/group, ~30 crypts per mouse).

Values are means  $\pm$  SEM. Statistical analysis was performed with two-way ANOVA (B) and Student's t test (G). \*\*\*\*  $P < 0.0001$ . Scale bars: 20  $\mu\text{m}$  (C and G), 50  $\mu\text{m}$  (D and F), 100  $\mu\text{m}$  (E), and 200  $\mu\text{m}$  (A).

**Figure S6, related to Figure 5. Overexpression of *Srebf2* increases Id1-positive progenitor cells.**

(A) Free cholesterol content in crypts isolated from chow and cholesterol diet fed mice.

(B) Representative images of immunostaining and quantification of Id1 positive progenitor cells in Jejunum of WT and *Srebf2* Tg mice (n=4 mice/group, ~50 crypts per mouse).

Values are means  $\pm$  SEM. Statistical analysis was performed with Student's t test. \*  $P < 0.05$ , \*\*\*\*  $P < 0.0001$ .

**Figure S7, related to Figure 6. Analysis of inflammation and gene expression in *Apc*<sup>min/+</sup> mice.**

(A-B) Representative images of immunostaining of Ly6G and F4/80 in F/F and *CreERT2*, and *Lpcat3*<sup>F/F</sup>, *CreERT2*, *Apc*<sup>min/+</sup> and *Lpcat3*<sup>F/F</sup>, *Apc*<sup>min/+</sup> intestines.

(C) Expression of cytokines in *Lpcat3*<sup>F/F</sup>, *CreERT2*, *Apc*<sup>min/+</sup> and *Lpcat3*<sup>F/F</sup>, *Apc*<sup>min/+</sup> intestines (n=6-7 mice/group).

(D) Expression of selective genes in cholesterol biosynthetic pathway WT and *Apc*<sup>min/+</sup> Jejunums, analyzed by real-time RT-PCR (n=6-7 mice/group).

(E) Hematocrit in *Apc*<sup>min/+</sup> and *Srebf2* Tg, *Apc*<sup>min/+</sup> mice.

Values are means ± SEM. Statistical analysis was performed with Student's t test. \*  $P < 0.05$ , \*\*  $P < 0.01$ , \*\*\*\*  $P < 0.0001$ .

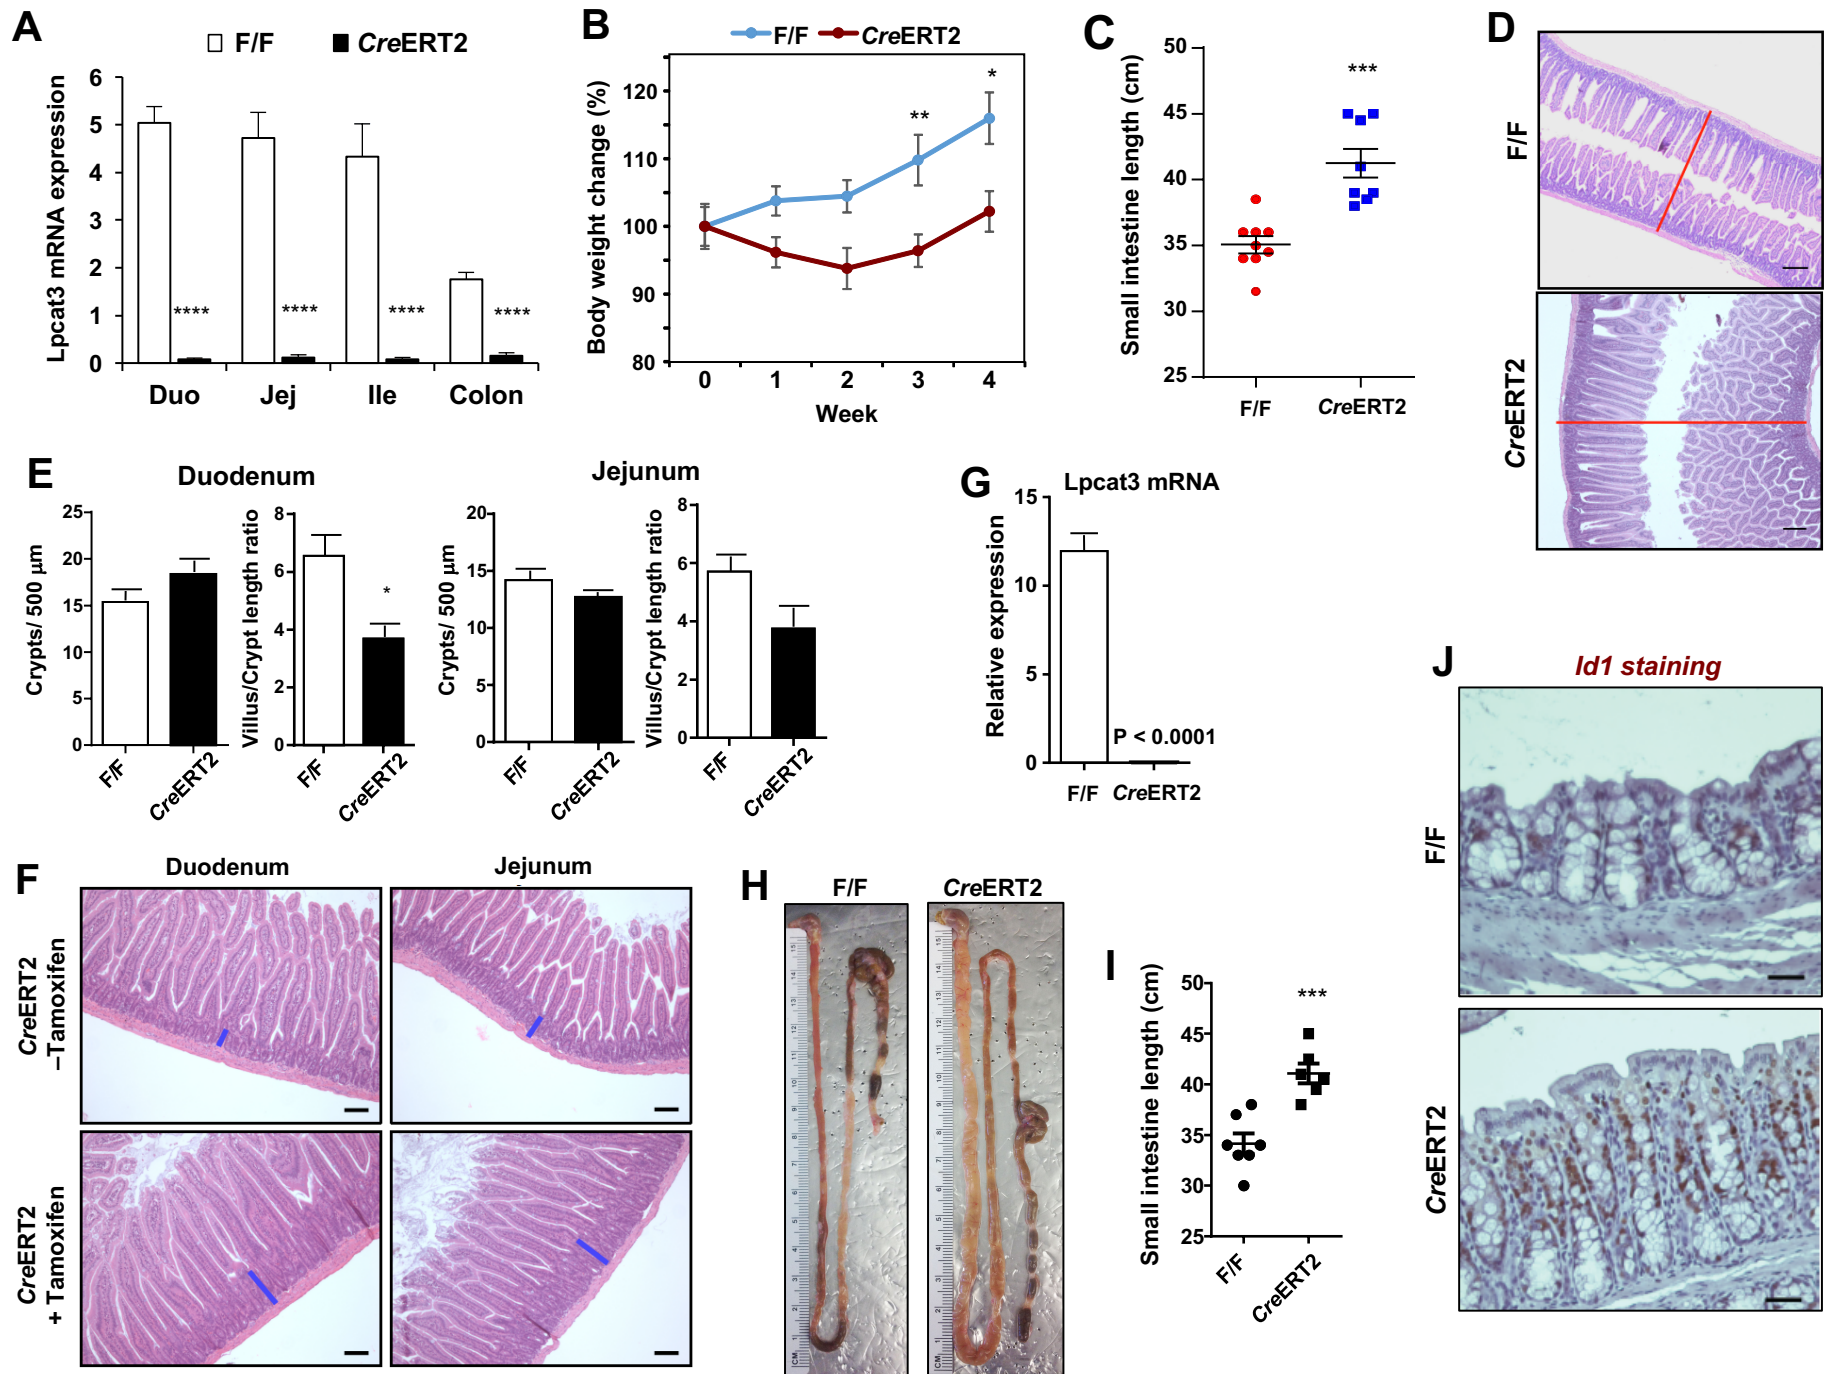

Wang Suppl. Fig. 1, related to Figure 1



**A**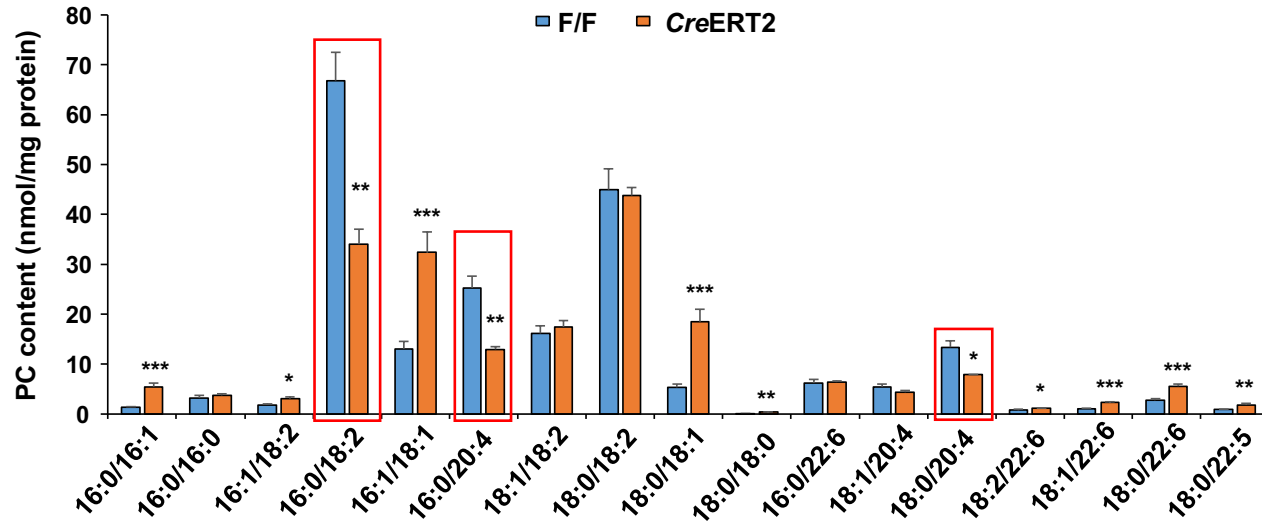**B**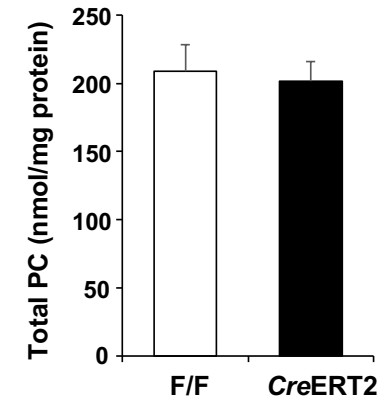**C**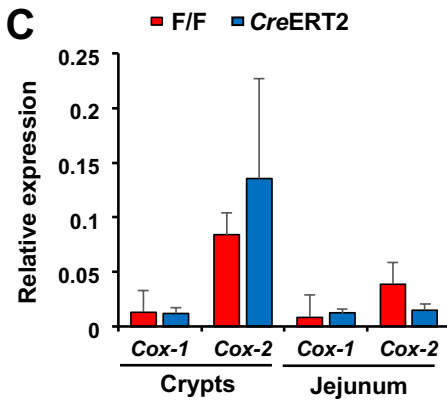**D**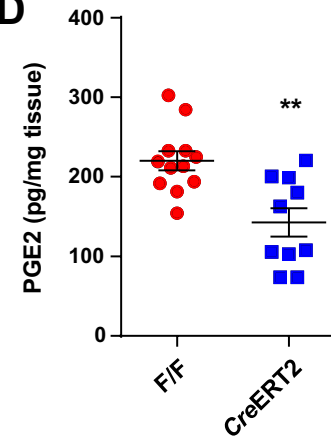



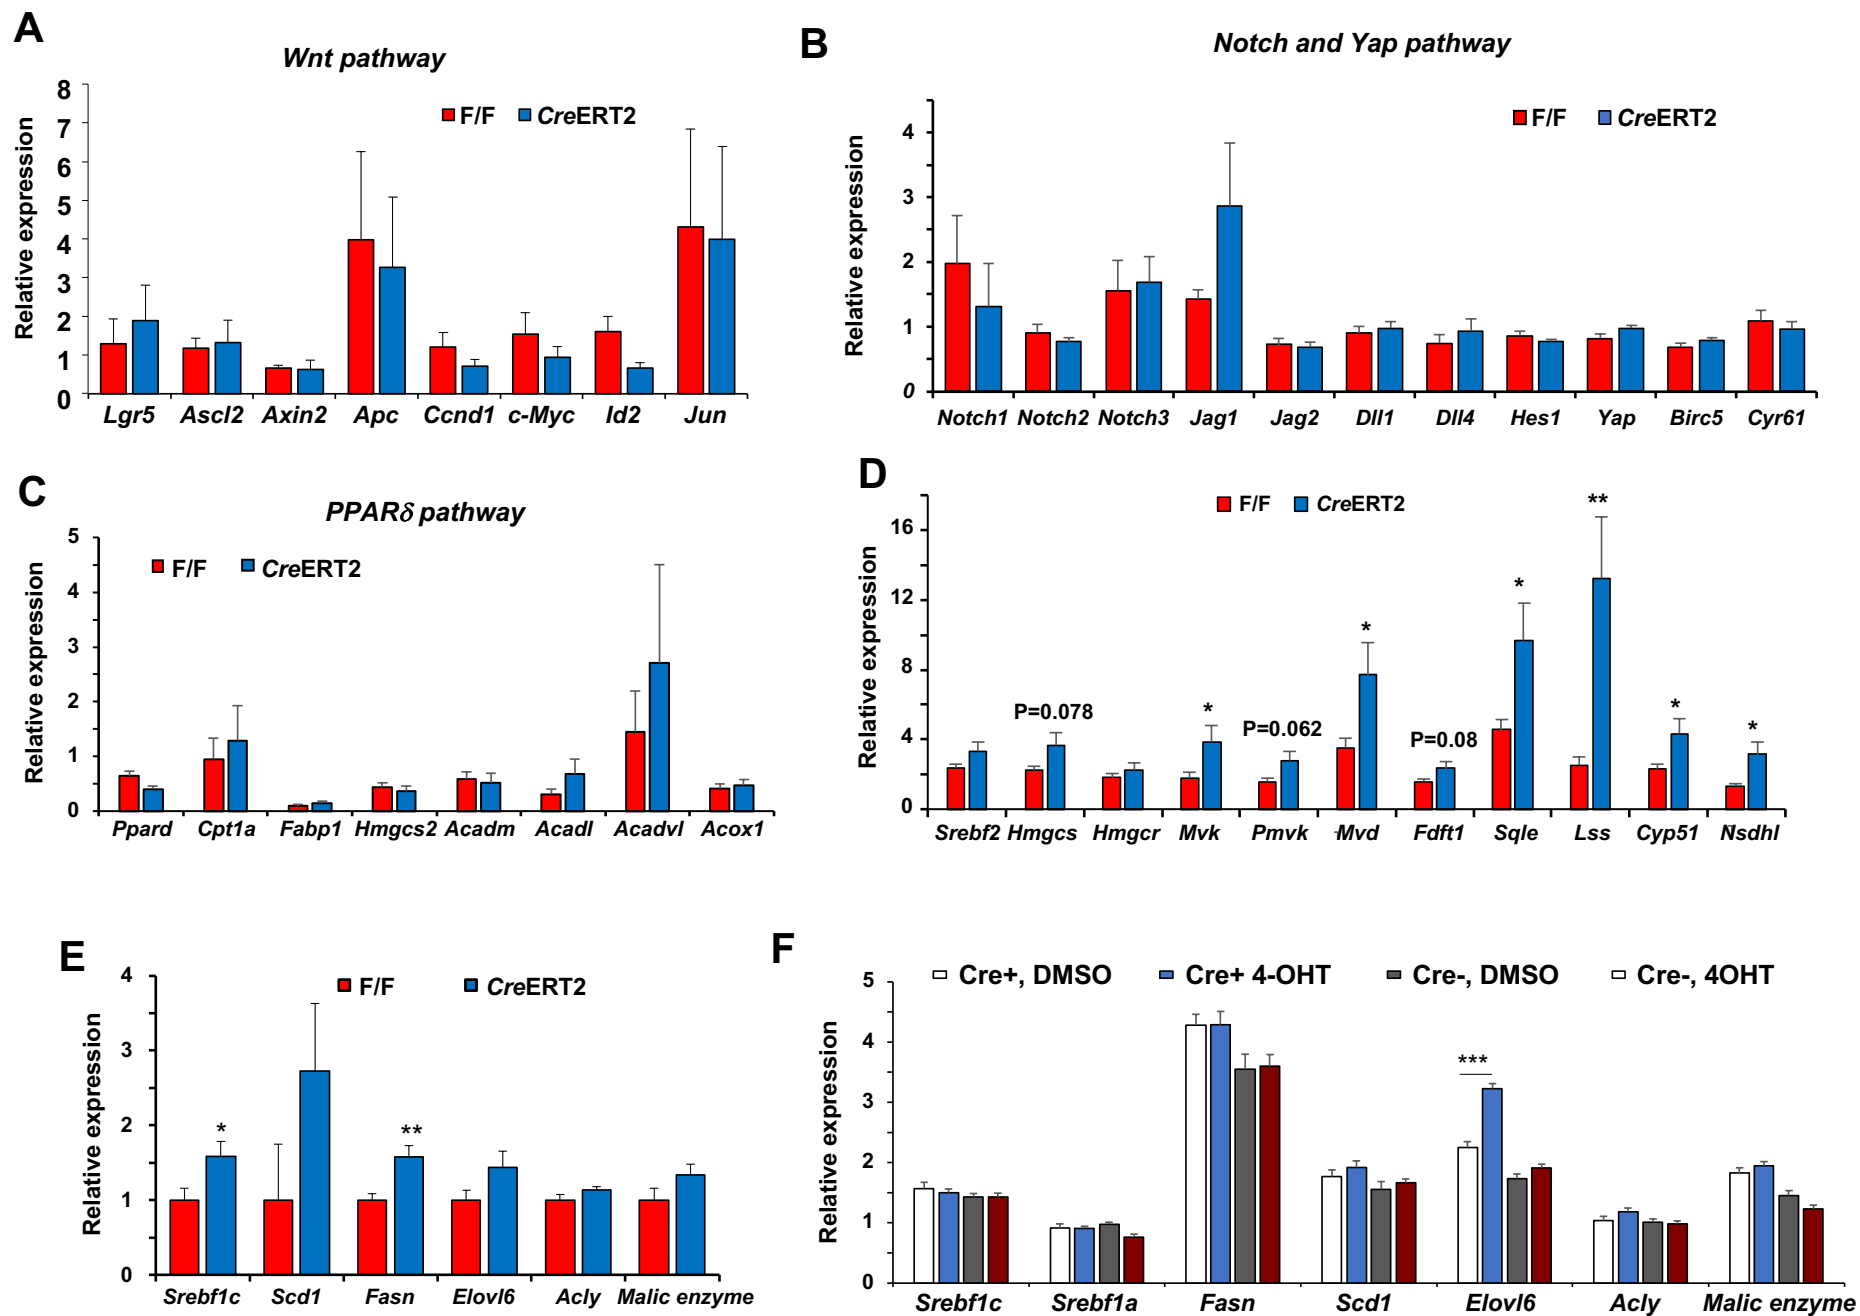

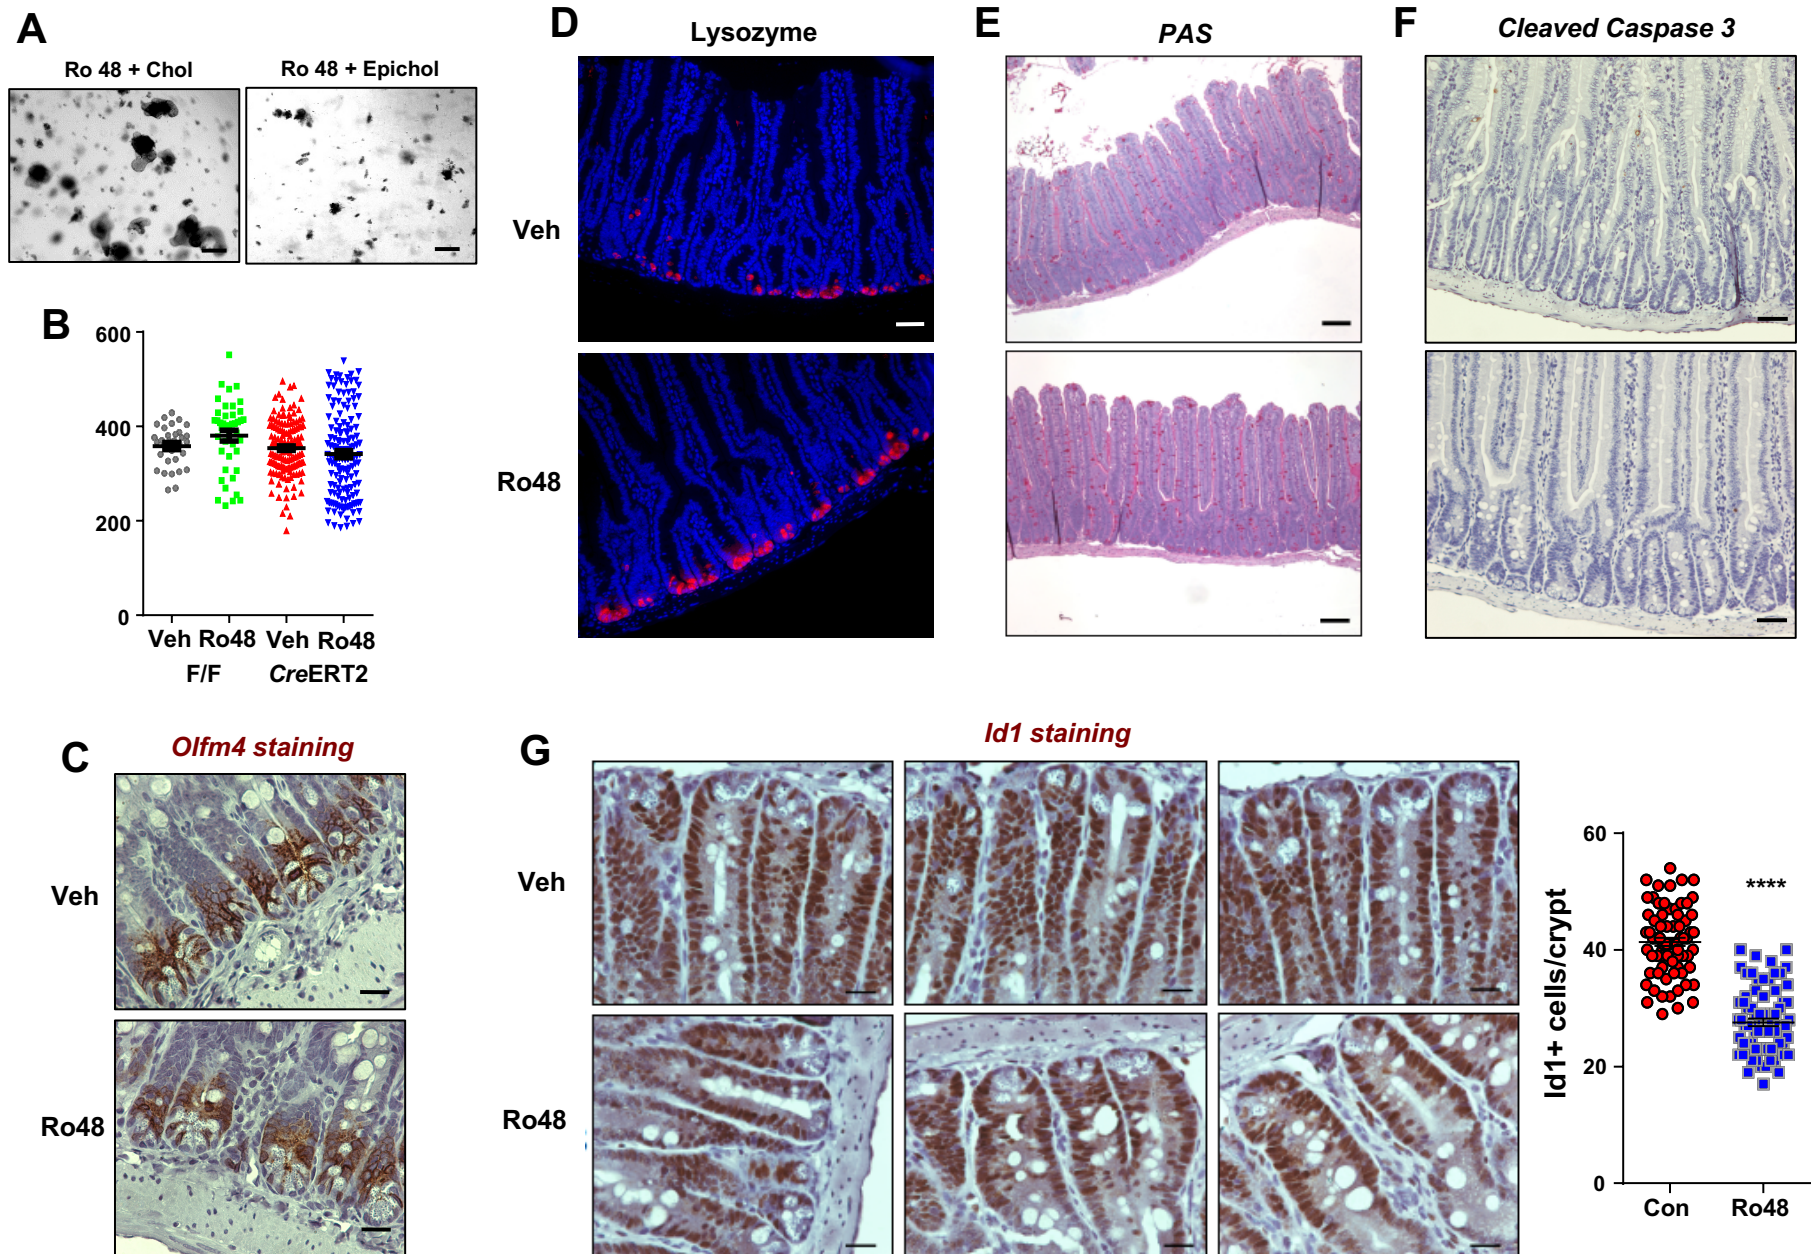

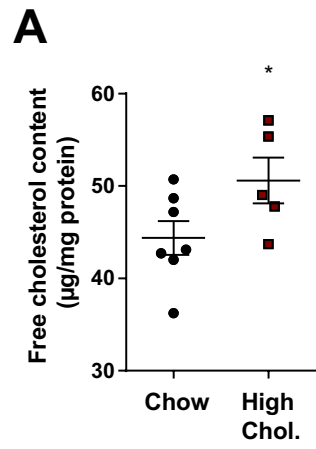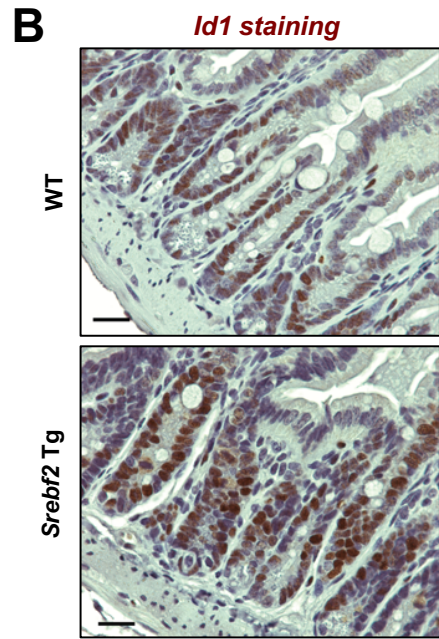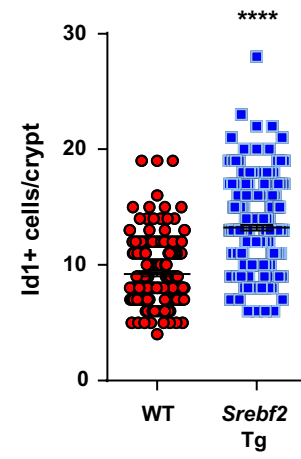

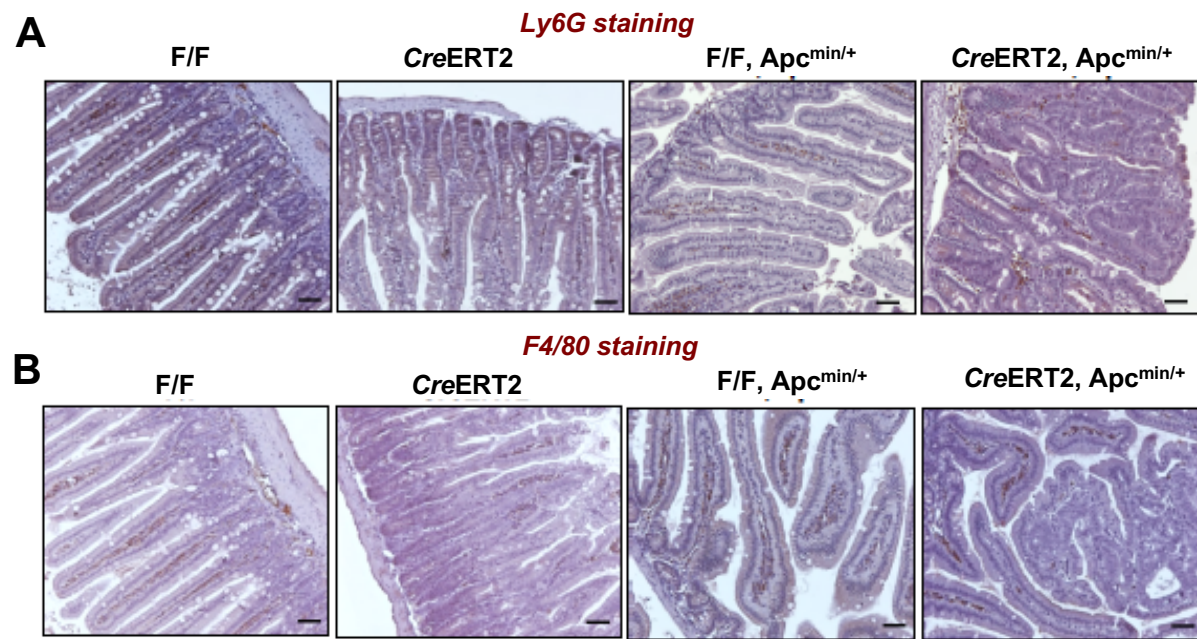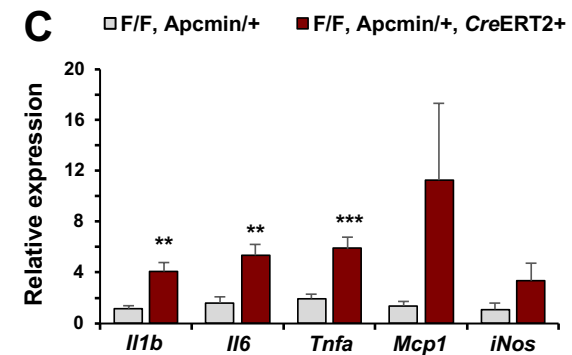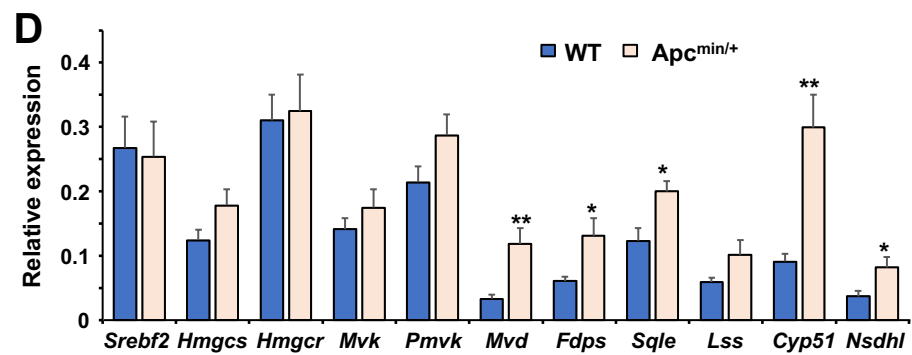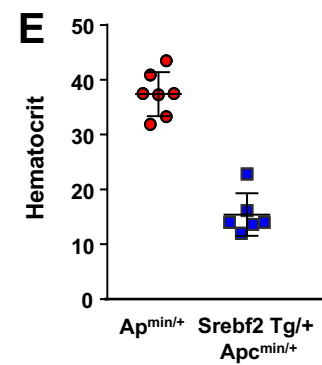

Supplemental Table 1, related to STAR methods. Primer sequences used.

| Primer      | Sequence                          |
|-------------|-----------------------------------|
| 36B4 F      | GGCCCTGCACTCTCGCTTTC              |
| 36B4 R      | TGCCAGGACGCGCTTGT                 |
| Actin F     | GGCTGTATTCCCCTCCATCG              |
| Actin R     | CCAGTTGGTAAACAATGCCATGT           |
| Lpcat3 F    | GGC CTC TCA ATT GCT TAT TTC A     |
| Lpcat3 R    | AGC ACG ACA CAT AGC AAG GA        |
| Srebf2 F    | ACCTAGACCTCGCCAAAGGT              |
| Srebf2 R    | GCACGGATAAGCAGGTTTGT              |
| Hmgcr F     | CTT GTG GAA TGC CTT GTG ATT G     |
| Hmgcr R     | AGC CGA AGC AGC ACA TGA T         |
| Hmgcs1 F    | GCCGTGAACTGGGTCGAA                |
| Hmgcs1 R    | GCATATATAGCAATGTCTCCT             |
| Mvd F       | ATGGCCTCAGAAAAGCCTCAG             |
| Mvd R       | TGGTCGTTTTAGCTGGTCCT              |
| Fdps F      | GGAGGTCCTAGAGTACAATGC             |
| Fdps R      | AAGCCTGGAGCAGTTCTACAC             |
| Lss F       | TCGTGGGGGACCCTATAAAAC             |
| Lss R       | CGTCTCCGCTTGATAATAAG              |
| Cyp51 F     | GACAGGAGGCAACTTGCTTTC             |
| Cyp51 R     | GTGGACTTTTCGCTCCAGC               |
| Idi1 F      | ACCAGCCATCTTGATGAAAAA             |
| Idi1 R      | CAGCAACTATTGGTGAAACAA             |
| Nsdhl F     | TCATGGTGAATCAAAGCGAGG             |
| Nsdhl R     | CCGGGGGTATCAAAGCCTTG              |
| Mvk F       | GCTGTGGTCGGAACCTTCC               |
| Mvk R       | CCTTGAGCGGGTTGGAGAC               |
| Pmvk F      | AAAATCCGGGAAGGACTTCGT             |
| Pmvk R      | AGAGCACAGATGTTACCTCCA             |
| Fdft1 F     | ATGGAGTTCGTC AAGTGTCTA            |
| Fdft1 R     | CGTGCCGTATGTCCCCATC               |
| Il-1b F     | AGA AGC TGT GGC AGC TAC CTG       |
| Il-1b R     | GGA AAA GAA GGT GCT CAT GTC C     |
| Tnf alpha F | TGC CTA TGT CTC AGC CTC TTC       |
| Tnf alpha R | GAG GCC ATT TGG GAA CTT CT        |
| Mcp-1 F     | CATCCACGTGTTGGCTCA                |
| Mcp-1 R     | GATCATCTTGCTGGTGAATGA             |
| iNOS F      | GCAGCTGGGCTGTACAAA                |
| iNOS R      | AGCGTTTTCGGGATCTGAAT              |
| Il-6 F      | GCT ACC AAA CTG GAT ATA ATC AAG A |
| Il-6 R      | CCA GGT AGC TAT GGT ACT CCA GAA   |
| Fasn F      | TGCTCCAGCTGCAGGC                  |
| Fasn R      | GCCCGGTAGCTCTGGGTGTA              |
| Srebp1c F   | GGAGCCATGGATTGCACATT              |
| Srebp1c R   | GGCCCGGGAAGTCACTGT                |
| Srebp1a F   | GGCCGAGATGTGCGAAT                 |

|           |                         |
|-----------|-------------------------|
| Srebp1a R | TTGTTGATGAGCTGGAGCATG   |
| Elovl6 F  | CAGCAAAGCACCCGAACTA     |
| Elovl6 R  | AGGAGCACAGTGATGTGGTG    |
| Scd1 F    | CGAAGTCCACGCTCGATCTC    |
| Scd1 R    | TGTGGGCCGGCATGAT        |
| Lgr5 F    | GGGCGTTAAGTCCACTGTGT    |
| Lgr5 R    | CGAACACCTGCGTGAATATG    |
| Ascl2 F   | AAGCACACCTTGACTGGTACG   |
| Ascl2 R   | AAGTGGACGTTTGCACCTTCA   |
| Axin2 F   | TGACTCTCCTTCCAGATCCCA   |
| Axin2 R   | TGCCACACTAGGCTGACA      |
| Cox-1 F   | GTGCTGGGGCAGTGTGGAG     |
| Cox-1 R   | TGGGGCCTGAGTAGCCCGTG    |
| Cox-2 F   | CAAGGGAGTCTGGAACATTG    |
| Cox-2 R   | ACCCAGGTCCTCGTTATGA     |
| Hes1-F    | ACACCCGACAAAACCAAAGAC   |
| Hes1-R    | AATGCCGGGAGCTATCTTTC    |
| Atoh1-F   | GCCTTGCCGGACTCGTCTCTC   |
| Atoh1-R   | TCTGTGCCATCATCGTGTTAGGG |
| CTGF-F    | AGACCTGTGCCTGCCATTAC    |
| CTGF-R    | AGCCCATGTCTCCGTACATC    |
| Cyr61-F   | AGAGGCTTCTGTCTTTGGC     |
| Cyr61-R   | CCAAGACGTGGTCTGAACGA    |
| Birc5-F   | GAACCCGATGACAACCCGAT    |
| Birc5-R   | CTCCTTTGCAATTTTGTCTTGGC |
| Yap-F     | ATTTCCGGCAGGCAATACGGA   |
| Yap-R     | CATCCTGCTCCAGTGTAGGC    |
| Notch1-F  | CCCTTGCTCTGCCTAACGC     |
| Notch1-R  | GGAGTCTGGCATCGTTGG      |
| Notch2-F  | GGAATGGTGGCAGAGTTGAT    |
| Notch2-R  | TCGCCTCCACATTATTGACA    |
| Notch3-F  | GGACAAGATGCACTGGGAAT    |
| Notch3-R  | AGTCTCTTGGCCTCTGGACA    |
| Notch4-F  | TTCTCGTCCTCCAGCTCATT    |
| Notch4-R  | CCACTCCATCCTCATCCACT    |
| Jag2-F    | GCACCTGCACACATAACACC    |
| Jag2-R    | TTGACGCCATCAACACAGAT    |
| Dll1-F    | GGCTTCTCTGGCTTCAACTG    |
| Dll1-R    | CACCGGCACAGGTAAGAGTT    |
| Dll4-F    | ACCTTTGGCAATGTCTCCAC    |
| Dll4-R    | GTTTCTGGCGAAGTCTCTG     |
| Taz-F     | GAAGGTGATGAATCAGCCTCTG  |
| Taz-R     | GTCTGAGTCGGGTGGTTCTG    |
| Apc F     | TGAGTGCCTTATGGAACCTGT   |
| Apc R     | CTCCGGTAAGTGAGGGTGC     |
| Ccnd1 F   | GAATCTGCCCTGTGACATGAAA  |
| Ccnd1 R   | CCATGGTGTGTCAACCAGAAAT  |
| Id2 F     | GACAGAACCAGGCGTCCA      |
| Id2 R     | AGCTCAGAAGGGAATTCAGATG  |

|          |                              |
|----------|------------------------------|
| Jun F    | GAAAAGTAGCCCCAACCTC          |
| Jun R    | GGGACACAGCTTTCACCCTA         |
| Jag1 F   | GCTTCGGCTCAGGGTCTAC          |
| Jag1 R   | GGCGAAACTGAAAGGCAGTA         |
| c-Myc F  | GCACAAGCTCACCTCTGAAAAGGAC    |
| c-Myc R  | CTCACGAGAGATTCCAGCTCCTCC     |
| Acadm F  | TTACCGAAGAGTTGGCGTATGG       |
| Acadm R  | TGCGGAGGGCTCTGTAC            |
| Acadl F  | CTCCCTGCGCTCCTGAG            |
| Acadl R  | AAAATGTCATGCTCCGAGGAAAAG     |
| Acadvl F | GCCGACACACAACCTTTG           |
| Acadvl R | CCGAGCCGACTGCATCTC           |
| Fabp1 F  | CCA TGA CTG GGG AAA AAG TC   |
| Fabp1 R  | GCC TTT GAA AGT TGT CAC CAT  |
| Ppard F  | CTAAGCACATCTACAACGCCTACCT    |
| Ppard R  | GCCTGCCACAGTGTCTCGAT         |
| Cpt1a F  | CCGCCAATTCCAAAAAGTAAC        |
| Cpt1a R  | CATTTGGTTTGTATCACTAGA        |
| Hmgcs2 F | GCAGTGACAAACAGAACAACTTATACAA |
| Hmgcs2 R | GACCCCTGAAGGCCTCTAGG         |
| Acox1 F  | TCGAAGCCAGCGTTACGAG          |
| Acox1 R  | ATCTCCGCTCTGGGCGTAGG         |
